# Supplementary material for: Double maternal-effect: duplicated nucleoplasmin 2 genes, npm2a and npm2b, with essential but distinct functions are shared by fish and tetrapods
Source: BMC Evol Biol. 2018 Nov 12;18:167. doi: 10.1186/s12862-018-1281-3 (PMC6233590; doi:10.1186/s12862-018-1281-3)
Supplement: Supplementary file 1 — All the species used in each analysis. (XLSX 12 kb) [file 12862_2018_1281_MOESM1_ESM.xlsx]

## Sheet: Sheet1
Table S1: List of species that were used in each analysis.
Phylogenetic analysis		Syntenic analysis	RNA-seq	qPCR	Substitution rate analysis	Protein domain comparison	Histological and functional analyses
Human	Astyanax	Human	Bowfin	Xenopus	Dogfish	Cow	Zebrafish
Mouse	Panga	Mouse	European Eel	Zebrafish	Chinese Alligator	Emperor Penguin
Rat	Goldeye	Chicken	Sweetfish		Xenopus	Chicken
Guinea_Pig	Northern Pike	Xenopus	Elephantnose fish		Bowfin	Chinese Alligator
Pig	Eastern Mudminnow	Coelacanth	Panga		European_Eel	Coelacanth
Cow	Chinook Salmon	Spotted Gar	Northern Pike		Butterflyfish	Bowfin
Panda	American Whitefish	Zebrafish	Brook Trout		Sweetfish	Butterflyfish
Opossum	Brook Trout	Tetraodon	Brown Trout		Allis Shad	Allis Shad
Emperor Penguin	Brown Trout				Elephantnose Fish	Elephantnose fish
Turkey	Rainbow Trout				Zebrafish	Arowana
Ibis	European Whitefish				Panga	Astyanax
Ostrich	Coho Salmon				Astyanax	Eastern Mudminnow
Little Egret	Grayling				Goldeye	Chinook Salmon
Chicken	Atlantic Salmon				Northern Pike	American Whitefish
Hoatzin	Dogfish				Eastern Mudminnow	Brook Trout
Chinese Alligator	Ghost Shark				Chinook Salmon	Brown Trout
Turtle					American Whitefish	European Whitefish
Python					Brook Trout	Coho Salmon
Lizard					Brown Trout	Atlantic Salmon
Xenopus					Rainbow Trout	Dogfish
Coelacanth					European Whitefish	Ghost Shark
Spotted Gar					Coho Salmon
Bowfin					Grayling
European Eel
Butterflyfish
Sweetfish
Allis Shad
Elephantnose fish
Arowana
Zebrafish
