# Supplementary material for: Double maternal-effect: duplicated nucleoplasmin 2 genes, npm2a and npm2b, with essential but distinct functions are shared by fish and tetrapods
Source: BMC Evol Biol. 2018 Nov 12;18:167. doi: 10.1186/s12862-018-1281-3 (PMC6233590; doi:10.1186/s12862-018-1281-3)
Supplement: Supplementary file 3 — qPCR and PCR primers. (XLSX 9 kb) [file 12862_2018_1281_MOESM3_ESM.xlsx]

## Sheet: Table
Table S3. QPCR and PCR primers.
Gene	Primer sequence (5' – 3')
Xenopus npm2a forward	CAGCTTTCCAGCATCCATTC
Xenopus npm2a reverse	AGGCAAATCGTCCACAGTTC
Xenopus npm2b forward	TTATATGGGGGTGTGAGCTG
Xenopus npm2b reverse	ACGTGGAACTCATCCTTTGC
zebrafish npm2a forward	CATTACCCATTGCCACCCTC
zebrafish npm2a reverse	AGAGACAAACACAGGCCCTT
zebrafish npm2b forward	GTCACACCGCCAAAGATGAG
zebrafish npm2b reverse	TGCATGTTGACTTCACACGG
18S rRNA forward	CGGAGGTTCGAAGACGATCA
18S rRNA reverse	TCGCTAGTTGGCATCGTTTAT
beta-actin forward	CCGTGACATCAAGGAGAAGCT
beta-actin reverse	TCGTGGATACCGCAAGATTCC
ef1a forward	AGCGCAATCAGCCTGAGAGGTA
ef1a reverse	GCTGGACAAGCTGAAGGCTGAG
beta-microglobulin forward	GCCTTCACCCCAGAGAAAGG
beta-microglobulin reverse	GCGGTTGGGATTTACATGTTG
